# The Journal of Neuropsychiatry

## and Clinical Neurosciences

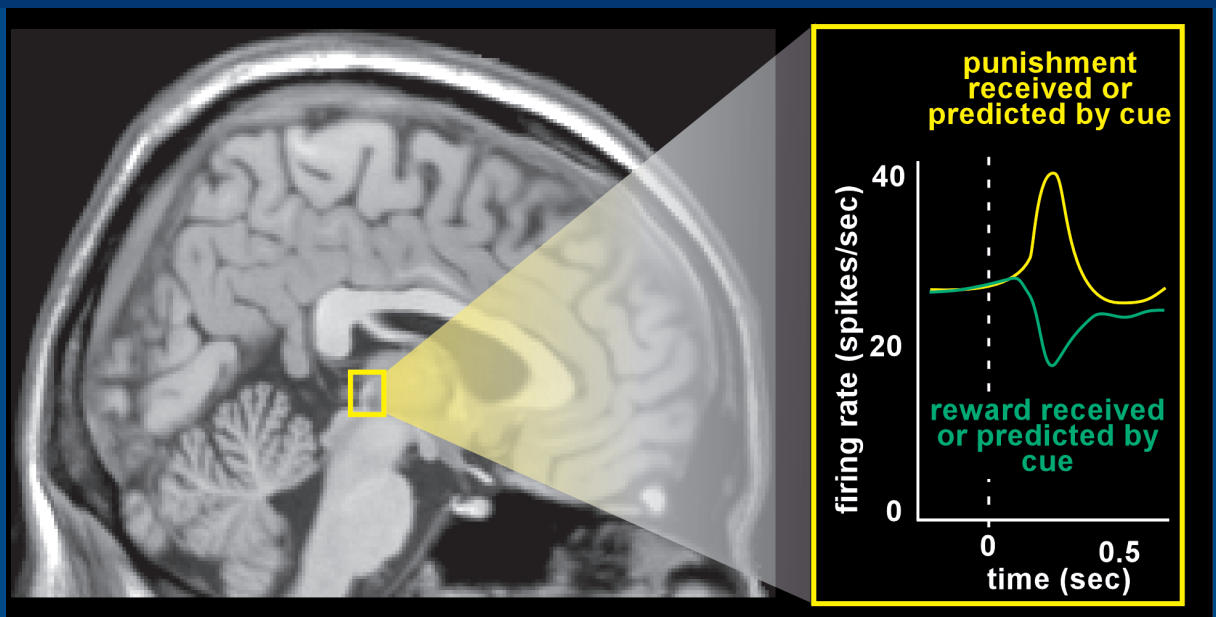

The Habenula's Role in Adaptive Behaviors:  
Contributions From Neuroimaging

Neurodegenerative Dementias After Traumatic Brain Injury

Noncognitive Behavioral Changes Associated With Alzheimer's  
Disease: Implications of Neuroimaging Findings

Responding to Ten Common Delirium Misconceptions With  
Best Evidence: An Educational Review for Clinicians

Guanfacine Attenuates Adverse Effects of Dronabinol (THC)  
on Working Memory in Adolescent-Onset Heavy  
Cannabis Users: A Pilot Study
